# Supplementary material for: Analysis of Bacterial Pathogens Causing Complicating HAP in Patients with Secondary Peritonitis
Source: MDPI journal article supplement (doi:10.3390/antibiotics12030527), 2023-03-06
Supplement: s1 [file s1]

# Supplementary Data

**Table S1.** Antibiotic susceptibility/resistance of enterobacteria causing HAP in patients with secondary peritonitis.

| Bacterial strain                 | Antibiotics |     |     |     |     |     |     |     |     |     |     |     |     |
|----------------------------------|-------------|-----|-----|-----|-----|-----|-----|-----|-----|-----|-----|-----|-----|
|                                  | AMP         | AMS | PPT | CRX | CTX | CTZ | CPM | MER | GEN | AMI | CIP | COL | TIG |
| <i>Klebsiella pneumoniae_1</i>   | R           | R   | R   | R   | R   | R   | R   | S   | R   | S   | R   | S   | S   |
| <i>Klebsiella pneumoniae_2</i>   | R           | S   | S   | S   | S   | S   | S   | S   | S   | S   | S   | S   | S   |
| <i>Klebsiella pneumoniae_3</i>   | R           | R   | R   | R   | R   | R   | R   | S   | R   | S   | R   | S   | S   |
| <i>Klebsiella pneumoniae_4</i>   | R           | R   | R   | R   | R   | R   | R   | S   | R   | S   | R   | S   | S   |
| <i>Klebsiella pneumoniae_5</i>   | R           | S   | S   | S   | S   | S   | S   | S   | R   | S   | S   | S   | S   |
| <i>Klebsiella pneumoniae_6</i>   | R           | R   | R   | R   | R   | R   | R   | S   | R   | S   | R   | S   | S   |
| <i>Klebsiella pneumoniae_7</i>   | R           | S   | S   | S   | S   | S   | S   | S   | S   | S   | S   | S   | S   |
| <i>Escherichia coli_1</i>        | R           | R   | R   | R   | R   | R   | R   | S   | R   | S   | R   | S   | S   |
| <i>Escherichia coli_2</i>        | S           | S   | S   | S   | S   | S   | S   | S   | S   | S   | S   | S   | S   |
| <i>Escherichia coli_3</i>        | R           | R   | R   | R   | R   | R   | R   | S   | R   | S   | R   | S   | S   |
| <i>Escherichia coli_4</i>        | R           | S   | S   | S   | S   | S   | S   | S   | S   | S   | S   | S   | S   |
| <i>Escherichia coli_5</i>        | S           | S   | S   | S   | S   | S   | S   | S   | S   | S   | S   | S   | S   |
| <i>Escherichia coli_6</i>        | R           | R   | R   | R   | R   | R   | R   | S   | R   | S   | R   | S   | S   |
| <i>Enterobacter cloacae_1</i>    | R           | R   | R   | R   | R   | R   | S   | S   | R   | S   | R   | S   | S   |
| <i>Enterobacter cloacae_2</i>    | R           | R   | R   | R   | R   | R   | S   | S   | R   | S   | R   | S   | S   |
| <i>Enterobacter cloacae_3</i>    | R           | R   | S   | R   | S   | S   | S   | S   | S   | S   | S   | S   | S   |
| <i>Enterobacter hormaechei_1</i> | R           | R   | R   | R   | R   | R   | S   | S   | R   | S   | R   | S   | S   |
| <i>Enterobacter hormaechei_2</i> | R           | R   | S   | R   | S   | S   | S   | S   | S   | S   | S   | S   | S   |
| <i>Klebsiella aerogenes_1</i>    | R           | R   | S   | R   | S   | S   | S   | S   | S   | S   | S   | S   | S   |
| <i>Klebsiella aerogenes_2</i>    | R           | R   | S   | R   | S   | S   | S   | S   | S   | S   | S   | S   | S   |
| <i>Serratia marcescens_1</i>     | R           | R   | S   | R   | S   | S   | S   | S   | S   | S   | S   | R   | R   |
| <i>Providencia rettgeri_1</i>    | R           | R   | S   | R   | S   | S   | S   | S   | S   | S   | S   | R   | R   |

Legend: S – susceptible, R – resistant, AMP – ampicillin, AMS – ampicillin/sulbactam, PPT – piperacillin/tazobactam, CRX – cefuroxime, CTX – cefotaxime, CTZ – ceftazidime, CPM – cefepime, MER – meropenem, GEN – gentamicin, AMI – amikacin, CIP – ciprofloxacin, COL – colistin, TIG – tigecycline

**Table S2.** Antibiotic susceptibility/resistance of nonfermenting Gram-negative bacteria causing HAP in patients with secondary peritonitis.

| Bacterial strain                      | Antibiotics |     |     |     |     |     |     |     |     |     |     |
|---------------------------------------|-------------|-----|-----|-----|-----|-----|-----|-----|-----|-----|-----|
|                                       | AMS         | PPT | CTZ | CPM | MER | GEN | AMI | CIP | COL | TIG | COT |
| <i>Pseudomonas aeruginosa_1</i>       | R           | R   | R   | R   | R   | R   | S   | R   | S   | R   | R   |
| <i>Pseudomonas aeruginosa_2</i>       | R           | S   | S   | S   | S   | S   | S   | S   | S   | R   | R   |
| <i>Pseudomonas aeruginosa_3</i>       | R           | R   | R   | R   | R   | R   | S   | R   | S   | R   | R   |
| <i>Pseudomonas aeruginosa_4</i>       | R           | R   | R   | R   | R   | R   | S   | R   | S   | R   | R   |
| <i>Pseudomonas aeruginosa_5</i>       | R           | R   | R   | R   | R   | R   | S   | R   | S   | R   | R   |
| <i>Pseudomonas aeruginosa_6</i>       | R           | S   | S   | S   | S   | S   | S   | R   | S   | R   | R   |
| <i>Pseudomonas aeruginosa_7</i>       | R           | R   | S   | S   | S   | R   | S   | S   | S   | R   | R   |
| <i>Pseudomonas aeruginosa_8</i>       | R           | R   | S   | S   | S   | S   | S   | S   | S   | R   | R   |
| <i>Pseudomonas aeruginosa_9</i>       | R           | R   | R   | R   | R   | R   | S   | R   | S   | R   | R   |
| <i>Acinetobacter baumannii_1</i>      | S           | S   | S   | S   | S   | S   | S   | S   | S   | S   | R   |
| <i>Acinetobacter baumannii_2</i>      | R           | R   | R   | R   | S   | R   | S   | R   | S   | S   | R   |
| <i>Stenotrophomonas maltophilia_1</i> | R           | R   | S   | S   | R   | R   | R   | R   | S   | S   | S   |
| <i>Burkholderia cepacia complex_1</i> | R           | R   | S   | S   | S   | R   | R   | R   | R   | S   | S   |

Legend: S – susceptible, R – resistant, AMS – ampicillin/sulbactam, PPT – piperacillin/tazobactam, CTZ – ceftazidime, CPM – cefepime, MER – meropenem, GEN – gentamicin, AMI – amikacin, CIP – ciprofloxacin, COL – colistin, TIG – tigecycline, COT – cotrimoxazole

**Table S3.** Antibiotic susceptibility/resistance of enterococci and *Staphylococcus aureus* causing HAP in patients with secondary peritonitis.

| Bacterial strain               | Antibiotics |     |     |     |     |     |     |     |     |
|--------------------------------|-------------|-----|-----|-----|-----|-----|-----|-----|-----|
|                                | AMP         | OXA | ERY | CLI | VAN | TEI | TIG | LNZ | COT |
| <i>Enterococcus faecalis_1</i> | S           | NT  | NT  | NT  | S   | S   | S   | S   | NT  |
| <i>Enterococcus faecalis_2</i> | S           | NT  | NT  | NT  | S   | S   | S   | S   | NT  |
| <i>Enterococcus faecalis_3</i> | S           | NT  | NT  | NT  | S   | S   | S   | S   | NT  |
| <i>Enterococcus faecalis_4</i> | S           | NT  | NT  | NT  | S   | S   | S   | S   | NT  |
| <i>Enterococcus faecalis_5</i> | S           | NT  | NT  | NT  | S   | S   | S   | S   | NT  |
| <i>Enterococcus faecium_1</i>  | R           | NT  | NT  | NT  | R   | R   | S   | S   | NT  |
| <i>Staphylococcus aureus_1</i> | NT          | S   | S   | S   | S   | S   | S   | S   | S   |
| <i>Staphylococcus aureus_2</i> | NT          | S   | S   | S   | S   | S   | S   | S   | S   |
| <i>Staphylococcus aureus_3</i> | NT          | S   | S   | S   | S   | S   | S   | S   | S   |
| <i>Staphylococcus aureus_4</i> | NT          | S   | S   | S   | S   | S   | S   | S   | S   |

Legend: S – susceptible, R – resistant, AMP – ampicillin, OXA – oxacillin, ERY – erythromycin, CLI – clindamycin, VAN – vancomycin, TEI – teicoplanin, TIG – tigecycline, LNZ – linezolid, COT – cotrimoxazole, NT – not tested
